# Supplementary material
Source: HighWire-hosted journal article supplement (https://www.cmajopen.ca/highwire/filestream/84467/field_highwire_adjunct_files/3/2020-0059-4-at.pdf)
Supplement: 2020-0059-4-at.pdf [file 2020-0059-4-at.pdf]

**Appendix 4 (as supplied by the authors): Allied health care staff response to individual WBI survey questions**

|                                                     | Have you felt burned out from your work |            |                      | Have you worried that work is hardening you emotionally |            |         | Have you often felt bothered by feeling down, depressed, or hopeless |            |         |
|-----------------------------------------------------|-----------------------------------------|------------|----------------------|---------------------------------------------------------|------------|---------|----------------------------------------------------------------------|------------|---------|
|                                                     | Yes (N=33)                              | No (N=12)  | P-value <sup>1</sup> | Yes (N=24)                                              | No (N=21)  | P-value | Yes (N=17)                                                           | No (N=28)  | P-value |
| <b>Gender, n (%)</b>                                |                                         |            | 0.02                 |                                                         |            | 0.60    |                                                                      |            | 0.29    |
| Male                                                | 0 (0.0%)                                | 3 (100.0%) |                      | 1 (33.3%)                                               | 2 (66.7%)  |         | 0 (0.0%)                                                             | 3 (100.0%) |         |
| Female                                              | 32 (78.0%)                              | 9 (22.0%)  |                      | 22 (53.7%)                                              | 19 (46.3%) |         | 16 (39.0%)                                                           | 25 (61.0%) |         |
| Gender Diverse                                      |                                         |            |                      |                                                         |            |         |                                                                      |            |         |
| Missing                                             | 1                                       | 0          |                      | 1                                                       | 0          |         | 1                                                                    | 0          |         |
| <b>When did you graduate from your field, n (%)</b> |                                         |            | 0.11                 |                                                         |            | 0.62    |                                                                      |            | 0.96    |
| <2 years                                            | 0 (0.0%)                                | 1 (100.0%) |                      | 0 (0.0%)                                                | 1 (100.0%) |         | 0 (0.0%)                                                             | 1 (100.0%) |         |
| 2-5 years                                           | 6 (60.0%)                               | 4 (40.0%)  |                      | 4 (40.0%)                                               | 6 (60.0%)  |         | 4 (40.0%)                                                            | 6 (60.0%)  |         |
| 6-10 years                                          | 9 (90.0%)                               | 1 (10.0%)  |                      | 7 (70.0%)                                               | 3 (30.0%)  |         | 4 (40.0%)                                                            | 6 (60.0%)  |         |
| 11-15 years                                         | 10 (90.9%)                              | 1 (9.1%)   |                      | 6 (54.5%)                                               | 5 (45.5%)  |         | 5 (45.5%)                                                            | 6 (54.5%)  |         |
| 16+ years                                           | 8 (61.5%)                               | 5 (38.5%)  |                      | 7 (53.8%)                                               | 6 (46.2%)  |         | 4 (30.8%)                                                            | 9 (69.2%)  |         |
| <b>When did you begin working at UHN, n (%)</b>     |                                         |            | 0.38                 |                                                         |            | 0.37    |                                                                      |            | 0.41    |
| <2 years                                            | 1 (33.3%)                               | 2 (66.7%)  |                      | 1 (33.3%)                                               | 2 (66.7%)  |         | 0 (0.0%)                                                             | 3 (100.0%) |         |
| 2-5 years                                           | 9 (75.0%)                               | 3 (25.0%)  |                      | 5 (41.7%)                                               | 7 (58.3%)  |         | 7 (58.3%)                                                            | 5 (41.7%)  |         |
| 6-10 years                                          | 8 (80.0%)                               | 2 (20.0%)  |                      | 8 (80.0%)                                               | 2 (20.0%)  |         | 4 (40.0%)                                                            | 6 (60.0%)  |         |
| 11-15 years                                         | 8 (88.9%)                               | 1 (11.1%)  |                      | 4 (44.4%)                                               | 5 (55.6%)  |         | 3 (33.3%)                                                            | 6 (66.7%)  |         |
| 16+ years                                           | 7 (63.6%)                               | 4 (36.4%)  |                      | 6 (54.5%)                                               | 5 (45.5%)  |         | 3 (27.3%)                                                            | 8 (72.7%)  |         |
| <b>Employment status at UNH, n (%)</b>              |                                         |            | 0.12                 |                                                         |            | 0.44    |                                                                      |            | 0.65    |
| Full-time permanent                                 | 30 (76.9%)                              | 9 (23.1%)  |                      | 22 (56.4%)                                              | 17 (43.6%) |         | 16 (41.0%)                                                           | 23 (59.0%) |         |
| Part-time permanent                                 | 3 (75.0%)                               | 1 (25.0%)  |                      | 2 (50.0%)                                               | 2 (50.0%)  |         | 1 (25.0%)                                                            | 3 (75.0%)  |         |
| Casual, temp, other                                 | 0 (0.0%)                                | 2 (100.0%) |                      | 0 (0.0%)                                                | 2 (100.0%) |         | 0 (0.0%)                                                             | 2 (100.0%) |         |
| Missing                                             | 0                                       | 0          |                      | 0                                                       | 0          |         | 0                                                                    | 0          |         |

|                                                                                                              |            |            |            |            |            |            |
|--------------------------------------------------------------------------------------------------------------|------------|------------|------------|------------|------------|------------|
| <b>Rate satisfaction with EMR, n (%)</b>                                                                     | 0.34       |            | 0.18       |            | 0.51       |            |
| Very unsatisfied                                                                                             | 4 (57.1%)  | 3 (42.9%)  | 2 (28.6%)  | 5 (71.4%)  | 1 (14.3%)  | 6 (85.7%)  |
| Somewhat unsatisfied                                                                                         | 8 (80.0%)  | 2 (20.0%)  | 8 (80.0%)  | 2 (20.0%)  | 4 (40.0%)  | 6 (60.0%)  |
| Neutral                                                                                                      | 6 (66.7%)  | 3 (33.3%)  | 5 (55.6%)  | 4 (44.4%)  | 5 (55.6%)  | 4 (44.4%)  |
| Somewhat satisfied                                                                                           | 14 (82.4%) | 3 (17.6%)  | 8 (47.1%)  | 9 (52.9%)  | 6 (35.3%)  | 11 (64.7%) |
| Very satisfied                                                                                               | 0 (0.0%)   | 1 (100.0%) | 0 (0.0%)   | 1 (100.0%) | 0 (0.0%)   | 1 (100.0%) |
| Missing                                                                                                      | 1          | 0          | 1          | 0          | 1          | 0          |
| <b>Somewhat / very satisfied with HER (vs. neutral / unsatisfied), n(%)</b>                                  | 0.73       |            | 0.54       |            | 0.76       |            |
| Yes                                                                                                          | 14 (77.8%) | 4 (22.2%)  | 8 (44.4%)  | 10 (55.6%) | 6 (33.3%)  | 12 (66.7%) |
| No                                                                                                           | 18 (69.2%) | 8 (30.8%)  | 15 (57.7%) | 11 (42.3%) | 10 (38.5%) | 16 (61.5%) |
| Missing                                                                                                      | 1          | 0          | 1          | 0          | 1          | 0          |
| <b>Staffing levels in this work setting are sufficient, n (%)</b>                                            | 0.25       |            | 0.05       |            | 0.25       |            |
| Disagree strongly                                                                                            | 9 (81.8%)  | 2 (18.2%)  | 8 (72.7%)  | 3 (27.3%)  | 6 (54.5%)  | 5 (45.5%)  |
| Disagree somewhat                                                                                            | 15 (71.4%) | 6 (28.6%)  | 9 (42.9%)  | 12 (57.1%) | 5 (23.8%)  | 16 (76.2%) |
| Neutral                                                                                                      | 1 (25.0%)  | 3 (75.0%)  | 0 (0.0%)   | 4 (100.0%) | 1 (25.0%)  | 3 (75.0%)  |
| Agree somewhat                                                                                               | 6 (85.7%)  | 1 (14.3%)  | 5 (71.4%)  | 2 (28.6%)  | 3 (42.9%)  | 4 (57.1%)  |
| Agree strongly                                                                                               | 1 (100.0%) | 0 (0.0%)   | 1 (100.0%) | 0 (0.0%)   | 1 (100.0%) | 0 (0.0%)   |
| Missing                                                                                                      | 1          | 0          | 1          | 0          | 1          | 0          |
| <b>Somewhat / strongly agree staffing levels in work setting are adequate (vs. neutral / disagree), n(%)</b> | 0.41       |            | 0.25       |            | 0.43       |            |
| Yes                                                                                                          | 7 (87.5%)  | 1 (12.5%)  | 6 (75.0%)  | 2 (25.0%)  | 4 (50.0%)  | 4 (50.0%)  |
| No                                                                                                           | 25 (69.4%) | 11 (30.6%) | 17 (47.2%) | 19 (52.8%) | 12 (33.3%) | 24 (66.7%) |
| Missing                                                                                                      | 1          | 0          | 1          | 0          | 1          | 0          |

|                                                                                      |            |           |            |            |            |            |
|--------------------------------------------------------------------------------------|------------|-----------|------------|------------|------------|------------|
| <b>I am treated fairly in the workplace, n (%)</b>                                   | 0.95       |           | 0.05       |            | 0.06       |            |
| Disagree strongly                                                                    | 6 (75.0%)  | 2 (25.0%) | 6 (75.0%)  | 2 (25.0%)  | 5 (62.5%)  | 3 (37.5%)  |
| Disagree somewhat                                                                    | 5 (71.4%)  | 2 (28.6%) | 6 (85.7%)  | 1 (14.3%)  | 4 (57.1%)  | 3 (42.9%)  |
| Neutral                                                                              | 4 (80.0%)  | 1 (20.0%) | 3 (60.0%)  | 2 (40.0%)  | 3 (60.0%)  | 2 (40.0%)  |
| Agree somewhat                                                                       | 11 (64.7%) | 6 (35.3%) | 7 (41.2%)  | 10 (58.8%) | 3 (17.6%)  | 14 (82.4%) |
| Agree strongly                                                                       | 6 (85.7%)  | 1 (14.3%) | 1 (14.3%)  | 6 (85.7%)  | 1 (14.3%)  | 6 (85.7%)  |
| Missing                                                                              | 1          | 0         | 1          | 0          | 1          | 0          |
| <b>Somewhat / strongly agree I am treated fairly (vs. neutral / disagree), n (%)</b> | 0.99       |           | 0.008      |            | 0.005      |            |
| Yes                                                                                  | 17 (70.8%) | 7 (29.2%) | 8 (33.3%)  | 16 (66.7%) | 4 (16.7%)  | 20 (83.3%) |
| No                                                                                   | 15 (75.0%) | 5 (25.0%) | 15 (75.0%) | 5 (25.0%)  | 12 (60.0%) | 8 (40.0%)  |
| Missing                                                                              |            |           | 1          | 0          | 1          | 0          |

<sup>1</sup>Fishers Exact p-value.

| Have you fallen asleep while sitting inactive in a public place |                                                                 |         | Have you felt that things were piling up so high you could not overcome them |                                                                |         | Have you been bothered by emotional problems                    |                                                              |         | Has physical health interfered with your ability to do daily work |                                                               |         |
|-----------------------------------------------------------------|-----------------------------------------------------------------|---------|------------------------------------------------------------------------------|----------------------------------------------------------------|---------|-----------------------------------------------------------------|--------------------------------------------------------------|---------|-------------------------------------------------------------------|---------------------------------------------------------------|---------|
| Yes<br>(N=16)                                                   | No<br>(N=29)                                                    | P-value | Yes<br>(N=19)                                                                | No<br>(N=26)                                                   | P-value | Yes<br>(N=31)                                                   | No<br>(N=14)                                                 | P-value | Yes<br>(N=16)                                                     | No<br>(N=29)                                                  | P-value |
| 2 (66.7%)<br>13 (31.7%)                                         | 1 (33.3%)<br>28 (68.3%)                                         | 0.26    | 0 (0.0%)<br>18 (43.9%)                                                       | 3 (100.0%)<br>23 (56.1%)                                       | 0.26    | 2 (66.7%)<br>28 (68.3%)                                         | 1 (33.3%)<br>13 (31.7%)                                      | 0.99    | 0 (0.0%)<br>15 (36.6%)                                            | 3 (100.0%)<br>26 (63.4%)                                      | 0.54    |
| 1                                                               | 0                                                               |         | 1                                                                            | 0                                                              |         | 1                                                               | 0                                                            |         | 1                                                                 | 0                                                             |         |
| 0 (0.0%)<br>5 (50.0%)<br>5 (50.0%)<br>4 (36.4%)<br>2 (15.4%)    | 1 (100.0%)<br>5 (50.0%)<br>5 (50.0%)<br>7 (63.6%)<br>11 (84.6%) | 0.31    | 0 (0.0%)<br>4 (40.0%)<br>4 (40.0%)<br>4 (36.4%)<br>7 (53.8%)                 | 1 (100.0%)<br>6 (60.0%)<br>6 (60.0%)<br>7 (63.6%)<br>6 (46.2%) | 0.90    | 1 (100.0%)<br>9 (90.0%)<br>7 (70.0%)<br>6 (54.5%)<br>8 (61.5%)  | 0 (0.0%)<br>1 (10.0%)<br>3 (30.0%)<br>5 (45.5%)<br>5 (38.5%) | 0.45    | 1 (100.0%)<br>2 (20.0%)<br>6 (60.0%)<br>5 (45.5%)<br>2 (15.4%)    | 0 (0.0%)<br>8 (80.0%)<br>4 (40.0%)<br>6 (54.5%)<br>11 (84.6%) | 0.07    |
| 2 (66.7%)<br>4 (33.3%)<br>6 (60.0%)<br>3 (33.3%)<br>1 (9.1%)    | 1 (33.3%)<br>8 (66.7%)<br>4 (40.0%)<br>6 (66.7%)<br>10 (90.9%)  | 0.11    | 1 (33.3%)<br>6 (50.0%)<br>2 (20.0%)<br>3 (33.3%)<br>7 (63.6%)                | 2 (66.7%)<br>6 (50.0%)<br>8 (80.0%)<br>6 (66.7%)<br>4 (36.4%)  | 0.33    | 3 (100.0%)<br>11 (91.7%)<br>6 (60.0%)<br>5 (55.6%)<br>6 (54.5%) | 0 (0.0%)<br>1 (8.3%)<br>4 (40.0%)<br>4 (44.4%)<br>5 (45.5%)  | 0.16    | 1 (33.3%)<br>6 (50.0%)<br>4 (40.0%)<br>3 (33.3%)<br>2 (18.2%)     | 2 (66.7%)<br>6 (50.0%)<br>6 (60.0%)<br>6 (66.7%)<br>9 (81.8%) | 0.62    |
| 12 (30.8%)<br>3 (75.0%)<br>1 (50.0%)<br>0                       | 27 (69.2%)<br>1 (25.0%)<br>1 (50.0%)<br>0                       | 0.13    | 19 (48.7%)<br>0 (0.0%)<br>0 (0.0%)<br>0                                      | 20 (51.3%)<br>4 (100.0%)<br>2 (100.0%)<br>0                    | 0.10    | 25 (64.1%)<br>4 (100.0%)<br>2 (100.0%)<br>0                     | 14 (35.9%)<br>0 (0.0%)<br>0 (0.0%)<br>0                      | 0.26    | 14 (35.9%)<br>1 (25.0%)<br>1 (50.0%)<br>0                         | 25 (64.1%)<br>3 (75.0%)<br>1 (50.0%)<br>0                     | 0.99    |

|            |            |            |            |            |            |            |            |
|------------|------------|------------|------------|------------|------------|------------|------------|
| 0.81       |            | 0.97       |            | 0.96       |            | 0.07       |            |
| 2 (28.6%)  | 5 (71.4%)  | 4 (57.1%)  | 3 (42.9%)  | 4 (57.1%)  | 3 (42.9%)  | 0 (0.0%)   | 7 (100.0%) |
| 5 (50.0%)  | 5 (50.0%)  | 4 (40.0%)  | 6 (60.0%)  | 7 (70.0%)  | 3 (30.0%)  | 4 (40.0%)  | 6 (60.0%)  |
| 4 (44.4%)  | 5 (55.6%)  | 4 (44.4%)  | 5 (55.6%)  | 6 (66.7%)  | 3 (33.3%)  | 6 (66.7%)  | 3 (33.3%)  |
| 5 (29.4%)  | 12 (70.6%) | 7 (41.2%)  | 10 (58.8%) | 12 (70.6%) | 5 (29.4%)  | 6 (35.3%)  | 11 (64.7%) |
| 0 (0.0%)   | 1 (100.0%) | 0 (0.0%)   | 1 (100.0%) | 1 (100.0%) | 0 (0.0%)   | 0 (0.0%)   | 1 (100.0%) |
| 0          | 1          | 0          | 1          | 1          | 0          | 0          | 1          |
| 0.36       |            | 0.76       |            | 0.75       |            | 0.76       |            |
| 5 (27.8%)  | 13 (72.2%) | 7 (38.9%)  | 11 (61.1%) | 13 (72.2%) | 5 (27.8%)  | 6 (33.3%)  | 12 (66.7%) |
| 11 (42.3%) | 15 (57.7%) | 12 (46.2%) | 14 (53.8%) | 17 (65.4%) | 9 (34.6%)  | 10 (38.5%) | 16 (61.5%) |
| 0          | 1          | 0          | 1          | 1          | 0          | 0          | 1          |
| 0.80       |            | 0.10       |            | 0.78       |            | 0.72       |            |
| 4 (36.4%)  | 7 (63.6%)  | 7 (63.6%)  | 4 (36.4%)  | 9 (81.8%)  | 2 (18.2%)  | 5 (45.5%)  | 6 (54.5%)  |
| 7 (33.3%)  | 14 (66.7%) | 5 (23.8%)  | 16 (76.2%) | 13 (61.9%) | 8 (38.1%)  | 7 (33.3%)  | 14 (66.7%) |
| 1 (25.0%)  | 3 (75.0%)  | 2 (50.0%)  | 2 (50.0%)  | 3 (75.0%)  | 1 (25.0%)  | 1 (25.0%)  | 3 (75.0%)  |
| 3 (42.9%)  | 4 (57.1%)  | 4 (57.1%)  | 3 (42.9%)  | 4 (57.1%)  | 3 (42.9%)  | 2 (28.6%)  | 5 (71.4%)  |
| 1 (100.0%) | 0 (0.0%)   | 1 (100.0%) | 0 (0.0%)   | 1 (100.0%) | 0 (0.0%)   | 1 (100.0%) | 0 (0.0%)   |
| 0          | 1          | 0          | 1          | 1          | 0          | 0          | 1          |
| 0.43       |            | 0.26       |            | 0.70       |            | 0.99       |            |
| 4 (50.0%)  | 4 (50.0%)  | 5 (62.5%)  | 3 (37.5%)  | 5 (62.5%)  | 3 (37.5%)  | 3 (37.5%)  | 5 (62.5%)  |
| 12 (33.3%) | 24 (66.7%) | 14 (38.9%) | 22 (61.1%) | 25 (69.4%) | 11 (30.6%) | 13 (36.1%) | 23 (63.9%) |
| 0          | 1          | 0          | 1          | 1          | 0          | 0          | 1          |

|           |            |            |            |            |            |           |            |
|-----------|------------|------------|------------|------------|------------|-----------|------------|
| 0.88      |            | 0.72       |            | 0.20       |            | 0.88      |            |
| 4 (50.0%) | 4 (50.0%)  | 2 (25.0%)  | 6 (75.0%)  | 6 (75.0%)  | 2 (25.0%)  | 4 (50.0%) | 4 (50.0%)  |
| 3 (42.9%) | 4 (57.1%)  | 4 (57.1%)  | 3 (42.9%)  | 7 (100.0%) | 0 (0.0%)   | 3 (42.9%) | 4 (57.1%)  |
| 1 (20.0%) | 4 (80.0%)  | 3 (60.0%)  | 2 (40.0%)  | 4 (80.0%)  | 1 (20.0%)  | 2 (40.0%) | 3 (60.0%)  |
| 6 (35.3%) | 11 (64.7%) | 7 (41.2%)  | 10 (58.8%) | 9 (52.9%)  | 8 (47.1%)  | 5 (29.4%) | 12 (70.6%) |
| 2 (28.6%) | 5 (71.4%)  | 3 (42.9%)  | 4 (57.1%)  | 4 (57.1%)  | 3 (42.9%)  | 2 (28.6%) | 5 (71.4%)  |
| 0         | 1          | 0          | 1          | 1          | 0          | 0         | 1          |
| 0.76      |            | 0.99       |            | 0.05       |            | 0.35      |            |
| 8 (33.3%) | 16 (66.7%) | 10 (41.7%) | 14 (58.3%) | 13 (54.2%) | 11 (45.8%) | 7 (29.2%) | 17 (70.8%) |
| 8 (40.0%) | 12 (60.0%) | 9 (45.0%)  | 11 (55.0%) | 17 (85.0%) | 3 (15.0%)  | 9 (45.0%) | 11 (55.0%) |
| 0         | 1          | 0          | 1          | 1          | 0          | 0         | 1          |

| Work I do is meaningful to me (categorized) |               |               |         | Work schedule leaves enough time for personal life (categorized) |             |               |         |
|---------------------------------------------|---------------|---------------|---------|------------------------------------------------------------------|-------------|---------------|---------|
| 1-2<br>(N=1)                                | 3-5<br>(N=10) | 6-7<br>(N=34) | P-value | 1-2<br>(N=14)                                                    | 3<br>(N=10) | 4-5<br>(N=21) | P-value |
| 0 (0.0%)                                    | 1 (33.3%)     | 2 (66.7%)     | 0.55    | 1 (33.3%)                                                        | 0 (0.0%)    | 2 (66.7%)     | 0.99    |
| 1 (2.4%)                                    | 8 (19.5%)     | 32 (78.0%)    |         | 12 (29.3%)                                                       | 10 (24.4%)  | 19 (46.3%)    |         |
| 0                                           | 1             | 0             |         | 1                                                                | 0           | 0             |         |
| 0 (0.0%)                                    | 0 (0.0%)      | 1 (100.0%)    | 0.68    | 0 (0.0%)                                                         | 0 (0.0%)    | 1 (100.0%)    | 0.19    |
| 0 (0.0%)                                    | 2 (20.0%)     | 8 (80.0%)     |         | 1 (10.0%)                                                        | 2 (20.0%)   | 7 (70.0%)     |         |
| 0 (0.0%)                                    | 2 (20.0%)     | 8 (80.0%)     |         | 3 (30.0%)                                                        | 2 (20.0%)   | 5 (50.0%)     |         |
| 1 (9.1%)                                    | 4 (36.4%)     | 6 (54.5%)     |         | 4 (36.4%)                                                        | 5 (45.5%)   | 2 (18.2%)     |         |
| 0 (0.0%)                                    | 2 (15.4%)     | 11 (84.6%)    |         | 6 (46.2%)                                                        | 1 (7.7%)    | 6 (46.2%)     |         |
| 0 (0.0%)                                    | 0 (0.0%)      | 3 (100.0%)    | 0.68    | 1 (33.3%)                                                        | 0 (0.0%)    | 2 (66.7%)     | 0.25    |
| 0 (0.0%)                                    | 2 (16.7%)     | 10 (83.3%)    |         | 1 (8.3%)                                                         | 4 (33.3%)   | 7 (58.3%)     |         |
| 0 (0.0%)                                    | 3 (30.0%)     | 7 (70.0%)     |         | 4 (40.0%)                                                        | 1 (10.0%)   | 5 (50.0%)     |         |
| 1 (11.1%)                                   | 3 (33.3%)     | 5 (55.6%)     |         | 2 (22.2%)                                                        | 4 (44.4%)   | 3 (33.3%)     |         |
| 0 (0.0%)                                    | 2 (18.2%)     | 9 (81.8%)     |         | 6 (54.5%)                                                        | 1 (9.1%)    | 4 (36.4%)     |         |
| 1 (2.6%)                                    | 8 (20.5%)     | 30 (76.9%)    | 0.36    | 14 (35.9%)                                                       | 8 (20.5%)   | 17 (43.6%)    | 0.31    |
| 0 (0.0%)                                    | 2 (50.0%)     | 2 (50.0%)     |         | 0 (0.0%)                                                         | 2 (50.0%)   | 2 (50.0%)     |         |
| 0 (0.0%)                                    | 0 (0.0%)      | 2 (100.0%)    |         | 0 (0.0%)                                                         | 0 (0.0%)    | 2 (100.0%)    |         |
| 0                                           | 0             | 0             |         | 0                                                                | 0           | 0             |         |



|           |            |            |            |           |            |
|-----------|------------|------------|------------|-----------|------------|
| 0.04      |            |            | 0.67       |           |            |
| 0 (0.0%)  | 1 (14.3%)  | 6 (85.7%)  | 2 (28.6%)  | 1 (14.3%) | 4 (57.1%)  |
| 1 (10.0%) | 5 (50.0%)  | 4 (40.0%)  | 3 (30.0%)  | 4 (40.0%) | 3 (30.0%)  |
| 0 (0.0%)  | 3 (33.3%)  | 6 (66.7%)  | 4 (44.4%)  | 2 (22.2%) | 3 (33.3%)  |
| 0 (0.0%)  | 1 (5.9%)   | 16 (94.1%) | 4 (23.5%)  | 3 (17.6%) | 10 (58.8%) |
| 0 (0.0%)  | 0 (0.0%)   | 1 (100.0%) | 1 (100.0%) | 0 (0.0%)  | 0 (0.0%)   |
| 0         | 0          | 1          | 0          | 0         | 1          |
| 0.04      |            |            | 0.57       |           |            |
| 0 (0.0%)  | 1 (5.6%)   | 17 (94.4%) | 5 (27.8%)  | 3 (16.7%) | 10 (55.6%) |
| 1 (3.8%)  | 9 (34.6%)  | 16 (61.5%) | 9 (34.6%)  | 7 (26.9%) | 10 (38.5%) |
| 0         | 0          | 1          | 0          | 0         | 1          |
| 0.05      |            |            | 0.71       |           |            |
| 1 (9.1%)  | 1 (9.1%)   | 9 (81.8%)  | 4 (36.4%)  | 2 (18.2%) | 5 (45.5%)  |
| 0 (0.0%)  | 4 (19.0%)  | 17 (81.0%) | 7 (33.3%)  | 4 (19.0%) | 10 (47.6%) |
| 0 (0.0%)  | 0 (0.0%)   | 4 (100.0%) | 0 (0.0%)   | 1 (25.0%) | 3 (75.0%)  |
| 0 (0.0%)  | 4 (57.1%)  | 3 (42.9%)  | 2 (28.6%)  | 3 (42.9%) | 2 (28.6%)  |
| 0 (0.0%)  | 1 (100.0%) | 0 (0.0%)   | 1 (100.0%) | 0 (0.0%)  | 0 (0.0%)   |
| 0         | 0          | 1          | 0          | 0         | 1          |
| 0.02      |            |            | 0.37       |           |            |
| 0 (0.0%)  | 5 (62.5%)  | 3 (37.5%)  | 3 (37.5%)  | 3 (37.5%) | 2 (25.0%)  |
| 1 (2.8%)  | 5 (13.9%)  | 30 (83.3%) | 11 (30.6%) | 7 (19.4%) | 18 (50.0%) |
| 0         | 0          | 1          | 0          | 0         | 1          |

|           |           |            |           |           |            |
|-----------|-----------|------------|-----------|-----------|------------|
| 0.23      |           |            | 0.90      |           |            |
| 0 (0.0%)  | 2 (25.0%) | 6 (75.0%)  | 3 (37.5%) | 2 (25.0%) | 3 (37.5%)  |
| 1 (14.3%) | 3 (42.9%) | 3 (42.9%)  | 3 (42.9%) | 1 (14.3%) | 3 (42.9%)  |
| 0 (0.0%)  | 2 (40.0%) | 3 (60.0%)  | 2 (40.0%) | 2 (40.0%) | 1 (20.0%)  |
| 0 (0.0%)  | 2 (11.8%) | 15 (88.2%) | 5 (29.4%) | 3 (17.6%) | 9 (52.9%)  |
| 0 (0.0%)  | 1 (14.3%) | 6 (85.7%)  | 1 (14.3%) | 2 (28.6%) | 4 (57.1%)  |
| 0         | 0         | 1          | 0         | 0         | 1          |
| 0.05      |           |            | 0.40      |           |            |
| 0 (0.0%)  | 3 (12.5%) | 21 (87.5%) | 6 (25.0%) | 5 (20.8%) | 13 (54.2%) |
| 1 (5.0%)  | 7 (35.0%) | 12 (60.0%) | 8 (40.0%) | 5 (25.0%) | 7 (35.0%)  |
| 0         | 0         | 1          | 0         | 0         | 1          |
